# Supplementary material
Source: PubMed Central journal article supplement (PMC6896791)
Supplement: NIHMS1058840-supplement-Supplemental_Data.pdf [file NIHMS1058840-supplement-Supplemental_Data.pdf]

## Supplementary Appendix

This appendix has been provided by the authors to give readers additional information about their work.

Supplement to: Lane NE, Schnitzer TJ, Birbara CA, et al. Tanezumab for the treatment of pain from osteoarthritis of the knee. *N Engl J Med* 2010;363:1521-31. DOI: 10.1056/NEJMoa0901510.

Table 1a. Baseline Characteristics of the Study Patients with Site 009 removed (N=421).

|                                       | Placebo<br>n=70 | Tanezumab<br>10 µg/kg<br>n=71 | Tanezumab<br>25 µg/kg<br>n=71 | Tanezumab<br>50 µg/kg<br>n=69 | Tanezumab<br>100 µg/kg<br>n=70 | Tanezumab<br>200 µg/kg<br>n=70 |
|---------------------------------------|-----------------|-------------------------------|-------------------------------|-------------------------------|--------------------------------|--------------------------------|
| Age, mean (SD), years                 | 58.3 (7.7)      | 58.1 (8.1)                    | 59.8 (8.2)                    | 60.6 (7.8)                    | 57.1 (8.2)                     | 58.8 (7.4)                     |
| Female, n (%)                         | 39 (55.7)       | 46 (64.8)                     | 47 (66.2)                     | 32 (46.4)                     | 42 (60.0)                      | 37 (52.9)                      |
| White, n (%)                          | 62 (88.6)       | 59 (83.1)                     | 64 (90.1)                     | 61 (88.4)                     | 63 (90.0)                      | 60 (85.7)                      |
| Kellgren–Lawrence X-ray grade, n (%)* |                 |                               |                               |                               |                                |                                |
| Grade 2                               | 17 (24.6)       | 20 (28.2)                     | 22 (30.6)                     | 27 (40.3)                     | 21 (30.0)                      | 17 (25.0)                      |
| Grade 3–4                             | 51 (73.9)       | 50 (70.4)                     | 50 (69.4)                     | 40 (59.7)                     | 49 (70.0)                      | 50 (73.5)                      |
| Walking knee pain, mean (SD), VAS*    | 71.6 (9.8)      | 70.5 (11.0)                   | 71.2 (10.4)                   | 67.9 (10.5)                   | 70.9 (11.2)                    | 72.6 (11.5)                    |
| SGA, mean (SD), VAS*                  | 49.0 (21.0)     | 55.2 (20.5)                   | 50.3 (20.5)                   | 51.8 (16.9)                   | 50.3 (19.7)                    | 54.8 (23.0)                    |
| WOMAC, mean (SD), VAS*                |                 |                               |                               |                               |                                |                                |
| Pain                                  | 69.1 (12.0)     | 65.7 (14.1)                   | 68.5 (12.3)                   | 61.7 (12.4)                   | 68.2 (13.1)                    | 68.7 (12.2)                    |
| Stiffness                             | 74.4 (13.7)     | 70.3 (12.4)                   | 74.7 (12.5)                   | 66.4 (17.8)                   | 71.4 (17.8)                    | 73.1 (13.2)                    |
| Physical function                     | 69.0 (12.6)     | 63.9 (13.7)                   | 68.8 (14.7)                   | 61.8 (12.3)                   | 67.6 (14.4)                    | 68.2 (14.3)                    |

Kellgren–Lawrence scores: 2 (minimal) = definite osteophytes without reduction of the joint space; 3 (moderate) = joint space has diminished; 4 (severe) = greatly reduced joint space.

Knee pain range = No pain (0) to extreme pain (100).

SGA range = Very poor (0) to very good (100).

WOMAC range = No pain, no stiffness, or very good physical function (0) to extreme pain, extreme stiffness, or very poor physical function (100).

\*Data for the mITT population.

SD, standard deviation; VAS, visual analog scale; SGA, Subject Global Assessment; WOMAC, Western Ontario and McMaster Universities Osteoarthritis Index; mITT, modified intent-to-treat.

Table 2a. **Secondary Efficacy Endpoints with Site 009 removed (N=417).**

|                                                     | Placebo<br>n=69 | Tanezumab<br>10 µg/kg<br>n=71 | Tanezumab<br>25 µg/kg<br>n=72 | Tanezumab<br>50 µg/kg<br>n=67 | Tanezumab<br>100 µg/kg<br>n=70 | Tanezumab<br>200 µg/kg<br>n=68 |
|-----------------------------------------------------|-----------------|-------------------------------|-------------------------------|-------------------------------|--------------------------------|--------------------------------|
| Mean change from baseline over weeks 1–16 (SE), VAS |                 |                               |                               |                               |                                |                                |
| WOMAC pain                                          | –16.4 (2.4)     | –30.2 (2.3)*                  | –37.3 (2.2)*                  | –28.4 (2.4)*                  | –38.9 (2.3)*                   | –43.4 (2.4)*                   |
| WOMAC stiffness                                     | –16.7 (2.5)     | –33.6 (2.3)*                  | –39.0 (2.3)*                  | –34.0 (2.5)*                  | –41.9 (2.3)*                   | –47.5 (2.4)*                   |
| WOMAC physical function                             | –15.3 (2.4)     | –30.3 (2.3)*                  | –36.1 (2.2)*                  | –30.2 (2.4)*                  | –39.9 (2.3)*                   | –43.8 (2.4)*                   |
| OMERACT-OARSI responder rate over weeks 1–16, %     | 44.9            | 74.6*                         | 86.1*                         | 73.1*                         | 92.9*                          | 94.1*                          |

\*P<0.001 vs. placebo.

WOMAC range = No pain, no stiffness, or very good physical function (0) to extreme pain, extreme stiffness, or very poor physical function (100).

SE, standard error; VAS, visual analog scale; WOMAC, Western Ontario and McMaster Universities Osteoarthritis Index; OMERACT-OARSI, Outcome Measures for Rheumatology Committee and Osteoarthritis Research Society International Standing Committee for Clinical Trials Response Criteria Initiative.

Table 3a. Frequency of Adverse Events with Site 009 removed (N=421).

|                                                                 | Placebo<br>n=70 | Tanezumab<br>10 µg/kg<br>n=71 | Tanezumab<br>25 µg/kg<br>n=71 | Tanezumab<br>50 µg/kg<br>n=69 | Tanezumab<br>100 µg/kg<br>n=70 | Tanezumab<br>200 µg/kg<br>n=70 |
|-----------------------------------------------------------------|-----------------|-------------------------------|-------------------------------|-------------------------------|--------------------------------|--------------------------------|
| Number of patients, n (%)                                       |                 |                               |                               |                               |                                |                                |
| Any AE                                                          | 41 (58.6)       | 51 (71.8)                     | 48 (67.6)                     | 44 (63.8)                     | 50 (71.4)                      | 57 (81.4)                      |
| Treatment-related AE                                            | 6 (8.6)         | 11 (15.5)                     | 13 (18.3)                     | 8 (11.6)                      | 21 (30.0)                      | 26 (37.1)                      |
| Any severe AE                                                   | 2 (2.9)         | 6 (8.5)                       | 3 (4.2)                       | 3 (4.3)                       | 2 (2.9)                        | 3 (4.3)                        |
| Treatment-related severe AE                                     | 0               | 0                             | 1 (1.4)                       | 0                             | 1 (1.4)                        | 0                              |
| Any serious AE*                                                 | 1 (1.4)         | 2 (2.8)                       | 0                             | 2 (2.9)                       | 0                              | 2 (2.9)                        |
| Treatment-related serious AE                                    | 0               | 0                             | 0                             | 0                             | 0                              | 0                              |
| AEs occurring in ≥5% of tanezumab-treated patients <sup>†</sup> |                 |                               |                               |                               |                                |                                |
| Headache                                                        | 2 (2.9)         | 8 (11.3)                      | 5 (7.0)                       | 8 (11.6)                      | 6 (8.6)                        | 6 (8.6)                        |
| Upper RTI                                                       | 4 (5.7)         | 2 (2.8)                       | 6 (8.5)                       | 5 (7.2)                       | 7 (10.0)                       | 7 (10.0)                       |
| Arthralgia                                                      | 0               | 1 (1.4)                       | 2 (2.8)                       | 5 (7.2)                       | 4 (5.7)                        | 7 (10.0)                       |
| Pain in extremity                                               | 0               | 3 (4.2)                       | 1 (1.4)                       | 2 (2.9)                       | 6 (8.6)                        | 9 (12.9)                       |
| Peripheral edema                                                | 2 (2.9)         | 0                             | 2 (2.8)                       | 5 (7.2)                       | 6 (8.6)                        | 8 (11.4)                       |
| AEs of abnormal peripheral sensation                            |                 |                               |                               |                               |                                |                                |
| Allodynia                                                       | 0               | 0                             | 0                             | 0                             | 1 (1.4)                        | 1 (1.4)                        |

|                     |         |         |         |         |          |          |
|---------------------|---------|---------|---------|---------|----------|----------|
| Burning sensation   | 1 (1.4) | 0       | 0       | 0       | 1 (1.4)  | 0        |
| Dysesthesia         | 0       | 0       | 0       | 0       | 1 (1.4)  | 1 (1.4)  |
| Hyperesthesia       | 0       | 0       | 0       | 3 (4.3) | 4 (5.7)  | 4 (5.7)  |
| Hypoesthesia        | 0       | 1 (1.4) | 6 (8.5) | 2 (2.9) | 5 (7.1)  | 5 (7.1)  |
| Neuralgia           | 0       | 0       | 0       | 0       | 1 (1.4)  | 0        |
| Neuritis            | 0       | 0       | 0       | 0       | 1 (1.4)  | 0        |
| Pallanesthesia      | 0       | 0       | 1 (1.4) | 0       | 0        | 1 (1.4)  |
| Paresthesia         | 2 (2.9) | 4 (5.6) | 4 (5.6) | 1 (1.4) | 8 (11.4) | 8 (11.4) |
| Sensory disturbance | 0       | 0       | 0       | 1 (1.4) | 1 (1.4)  | 2 (2.9)  |
| Sensory loss        | 0       | 0       | 1 (1.4) | 0       | 0        | 1 (1.4)  |

\*No serious AE was considered to be treatment-related.

†All tanezumab groups combined.

AE, adverse event; RTI, respiratory tract infection.

Figure 1a. Patient Disposition with Site 009 removed.

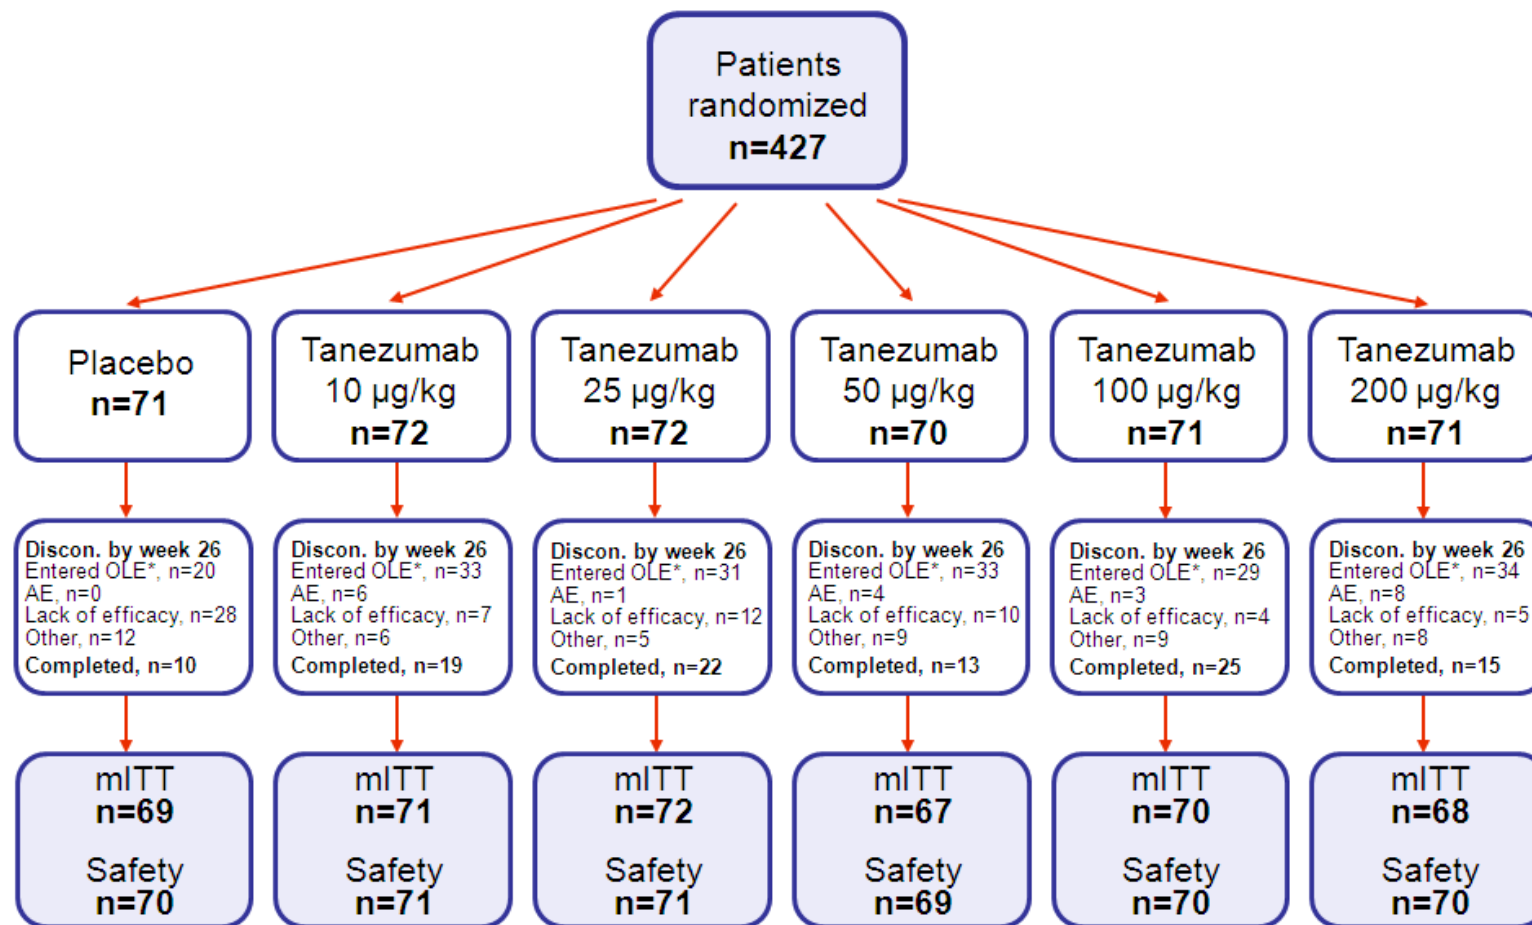

\*Patients could enter the OLE at week 16.

OLE, open-label extension; AE, adverse event; mITT, modified intent-to-treat.

Figure 2a. Change from Baseline in (A) Walking Knee Pain and (B) Subject Global Assessment with Site 009 removed (N=417).

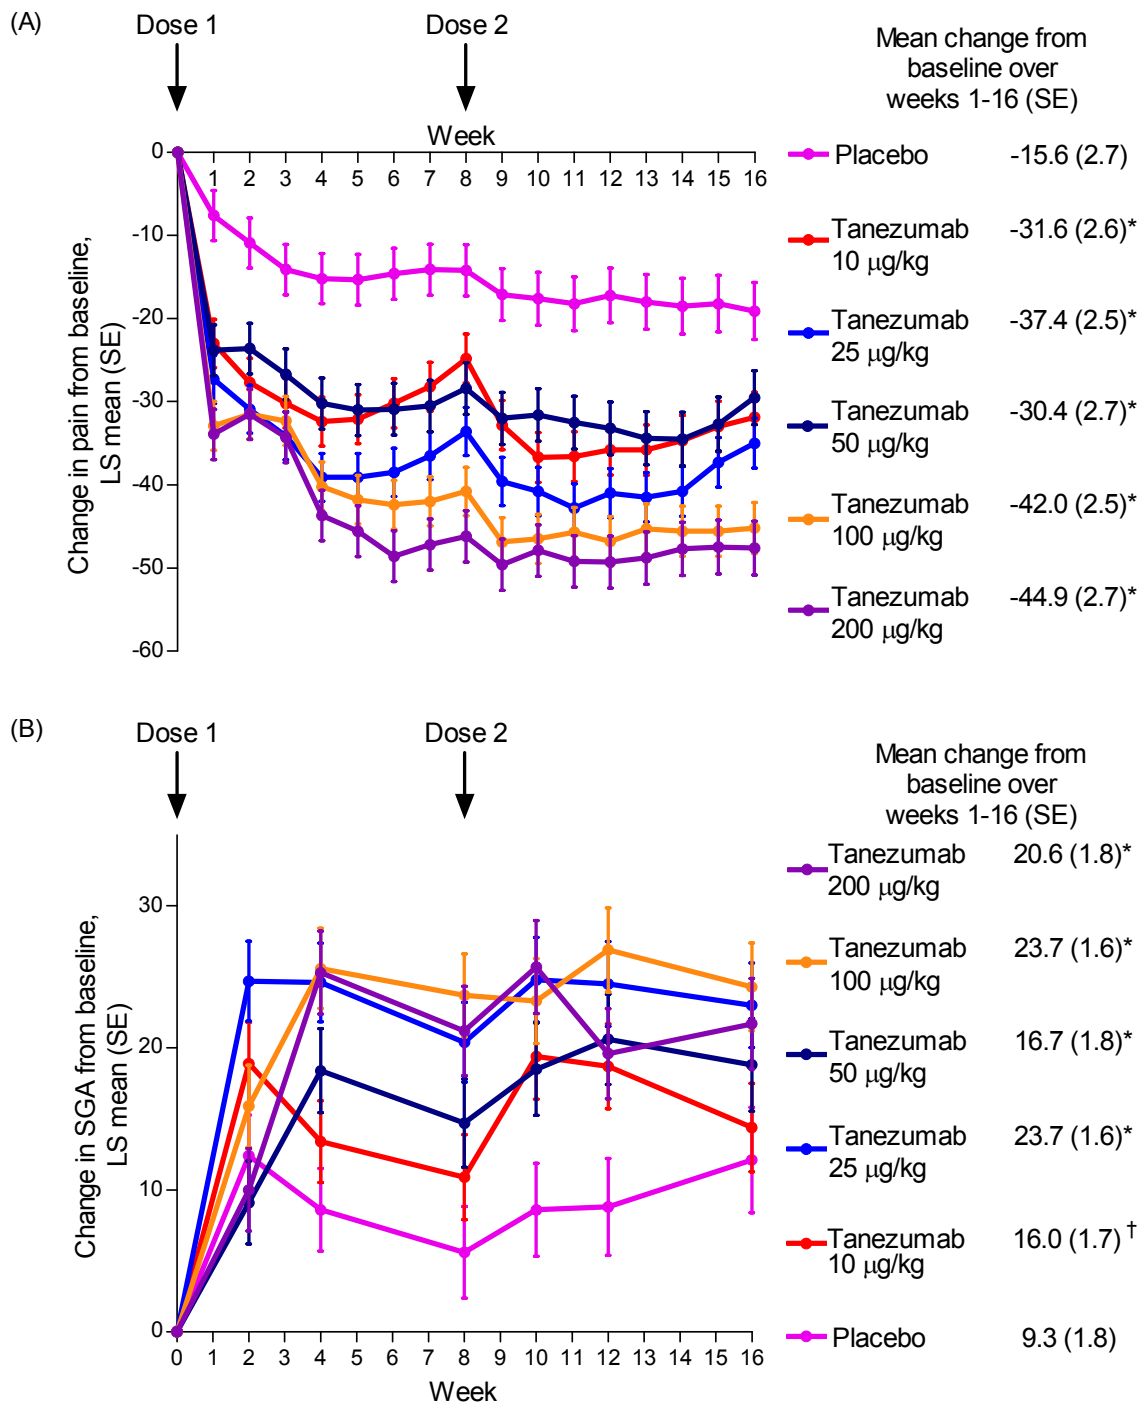

†P=0.001, \*P<0.001 vs. placebo.

Knee pain range = No pain (0) to extreme pain (100).

SGA range = Very poor (0) to very good (100).



**SGA, Subject Global Assessment; VAS, Visual Analog Scale; LS, least squares; SE, standard error.**
